# Supplementary material for: Microstructure and defect characteristics of lithium niobate with different Li concentrations
Source: Royal Society of Chemistry journal article supplement (doi:10.1039/d1qi00562f), 2021-01-01
Supplement: d1qi00562f1.pdf [file d1qi00562f1.pdf]

## Supporting information

### **Microstructure and defect characters of lithium niobate with different Li concentrations**

*Kunfeng Chen<sup>1,#</sup>, Yanlu Li<sup>1,#</sup>, Chao Peng<sup>2,#</sup>, Zheng Lu<sup>1</sup>, Xingyun Luo<sup>1</sup>, and Dongfeng  
Xue<sup>2,\*</sup>*

<sup>1</sup>State Key Laboratory of Crystal Materials, Institute of Crystal Materials, Shandong  
University, Jinan 250100, China

<sup>2</sup> Multiscale Crystal Materials Research Center, Shenzhen Institute of Advanced  
Technology, Chinese Academy of Sciences, Shenzhen 518055, China

<sup>#</sup>Contributions of all authors equally.

<sup>\*</sup>Corresponding author. E-mail: df.xue@siat.ac.cn

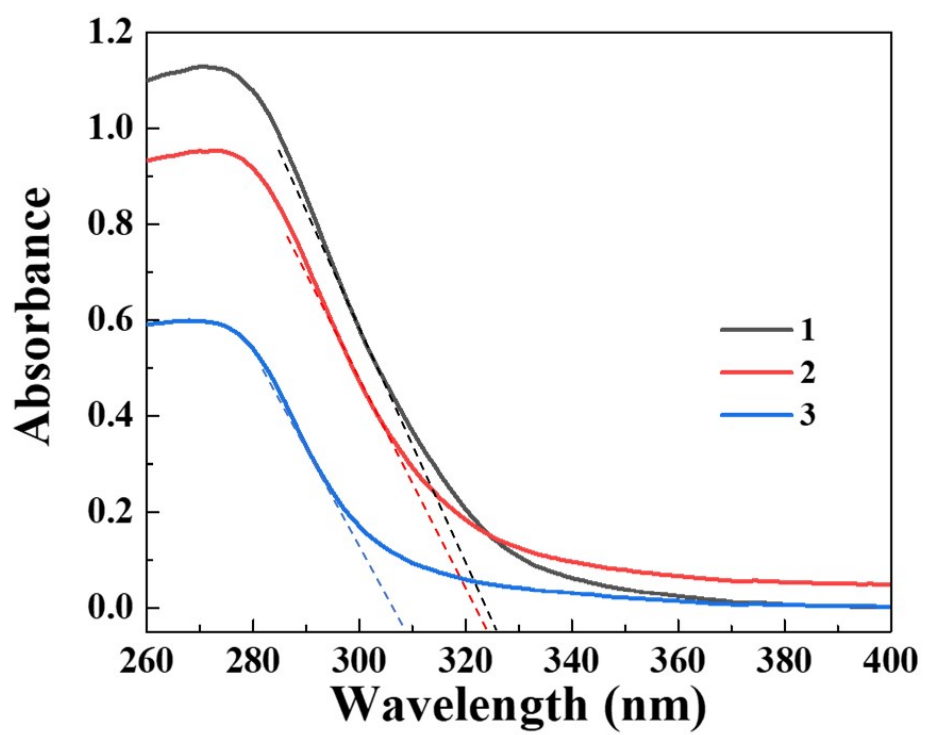

Fig. S1 UV-Vis absorption spectra of LN powder samples with different Li amounts.

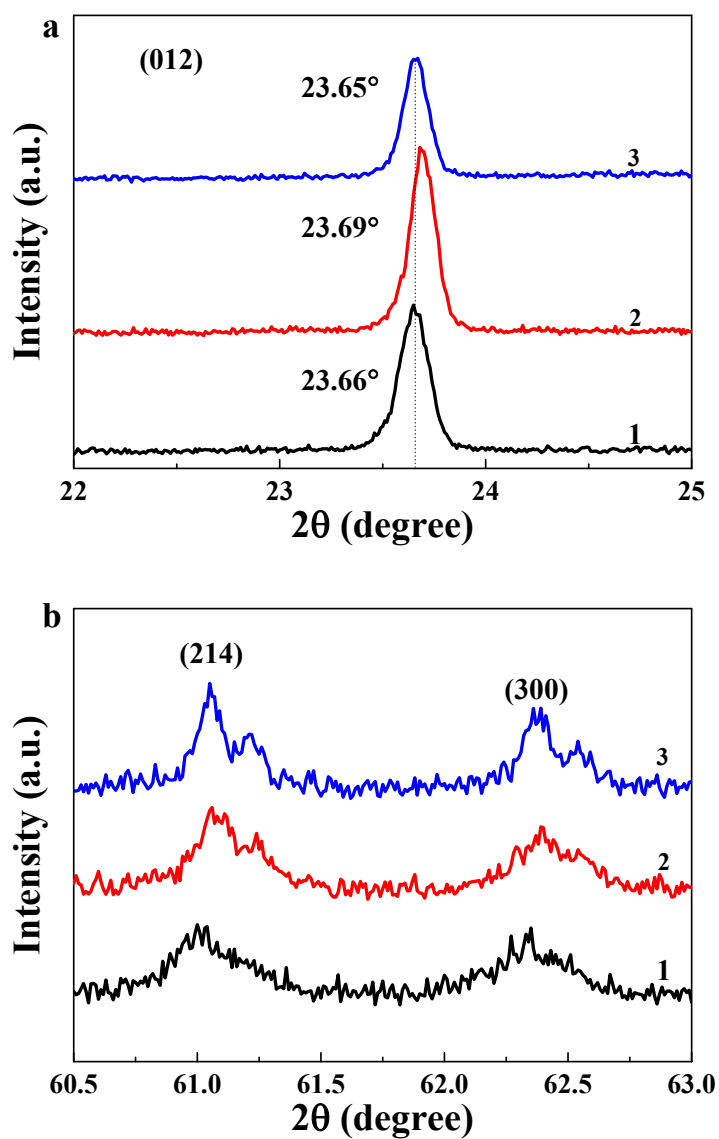

Fig. S2 Zoomed XRD patterns of the as-prepared LN samples with different Li amounts. (a) peak of (012) plane, (b) peaks of (214) and (300) planes.

Table S1 Frequencies of TO and LO phonons of symmetry A<sub>1</sub> and E on congruent LN crystal.<sup>1,2</sup>

| Modes | A <sub>1</sub> (TO)/cm <sup>-1</sup> | A <sub>1</sub> (LO)/cm <sup>-1</sup> | Motion          |
|-------|--------------------------------------|--------------------------------------|-----------------|
| 1     | 254                                  | 272                                  | Nb z, O z       |
| 2     | 275                                  | 332                                  | Nb z, Li z      |
| 3     | 332                                  | 419                                  | O x y           |
| 4     | 631                                  | 871                                  | O x y           |
| Modes | E(TO)/cm <sup>-1</sup>               | E(LO)/cm <sup>-1</sup>               | Motion          |
| 1     | 152                                  | 186                                  | Nb x, y, O x, y |
| 2     | 186                                  | 194                                  | (all)           |
| 3     | 236                                  | 238                                  | (all)           |
| 4     | 263                                  | 295                                  | (all)           |
| 5     | 322                                  | 366                                  | (all)           |
| 6     | 369                                  | 425                                  | (all)           |
| 7     | 432                                  | 456                                  | (all)           |
| 8     | 578                                  | 625                                  | (all)           |
| 9     | 738                                  | 880                                  | Nb x y, O x y   |

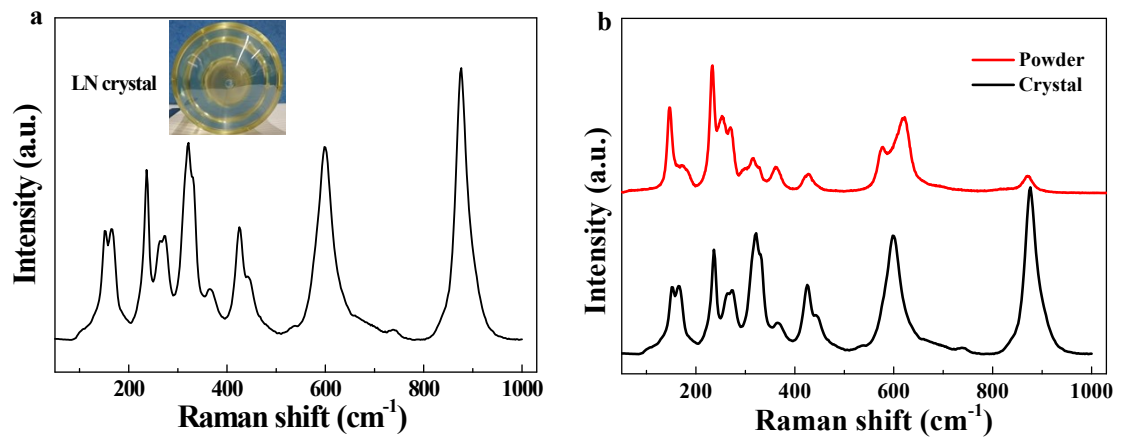

Fig. S3 Raman spectra of the as-grown LN single crystal (a) and 1# LN powder sample (b). Inset of (a) is photograph of LN single crystal along the  $c$ -direction grown by Czochralski method within our lab.

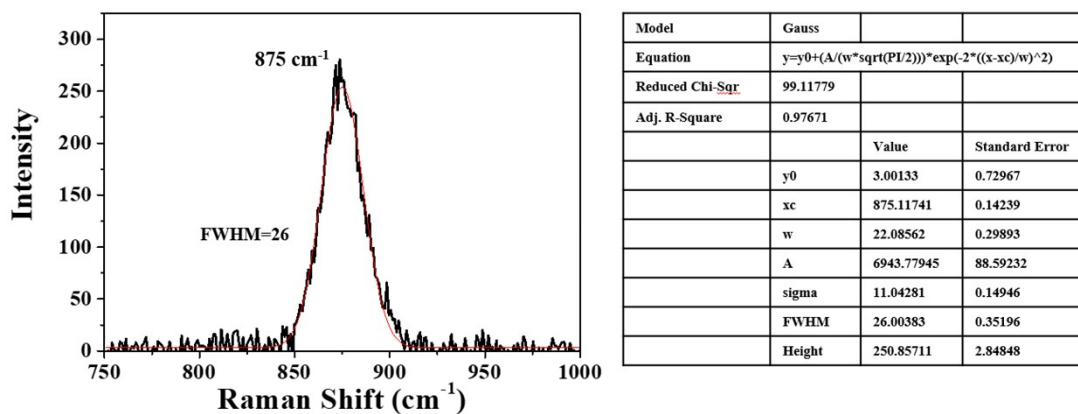

Fig. S4 E(LO) peak of sample 1 in Raman spectra. Red line is fitted curve. Right table lists our fitted data.

## References

1. M. D. Fontana, P. Bourson, Microstructure and defects probed by Raman spectroscopy in lithium niobite crystals and devices. *Appl. Phys. Rev.*, 2015, 2, 040602.
2. V. Caciuc, A. V. Postnikov, G. Borstel, Ab initio structure and zone-center phonons in LiNbO<sub>3</sub>. *Phys. Rev. B* 2000, 61, 8806.
